# Supplementary material for: Effect of polyunsaturated fatty acids on drug-sensitive and resistant tumor cells in vitro
Source: Springer Nature journal article supplement (doi:10.1186/1476-511x-10-159), 2011-01-01

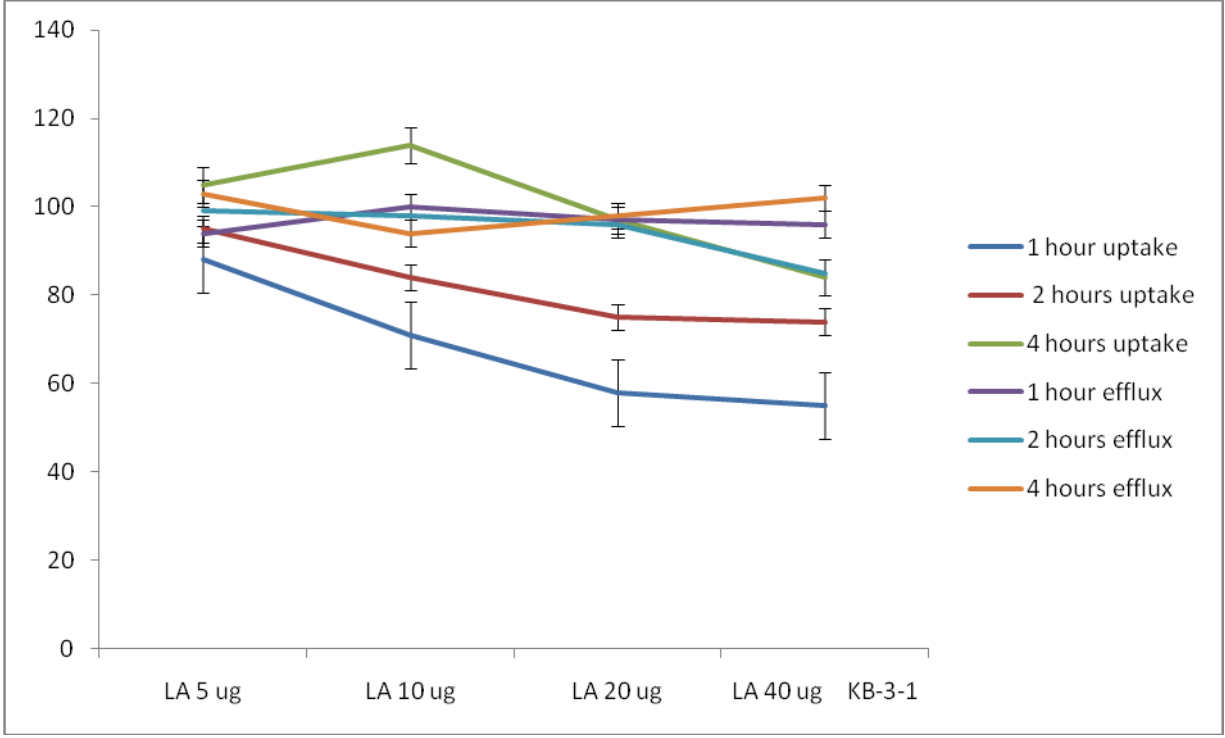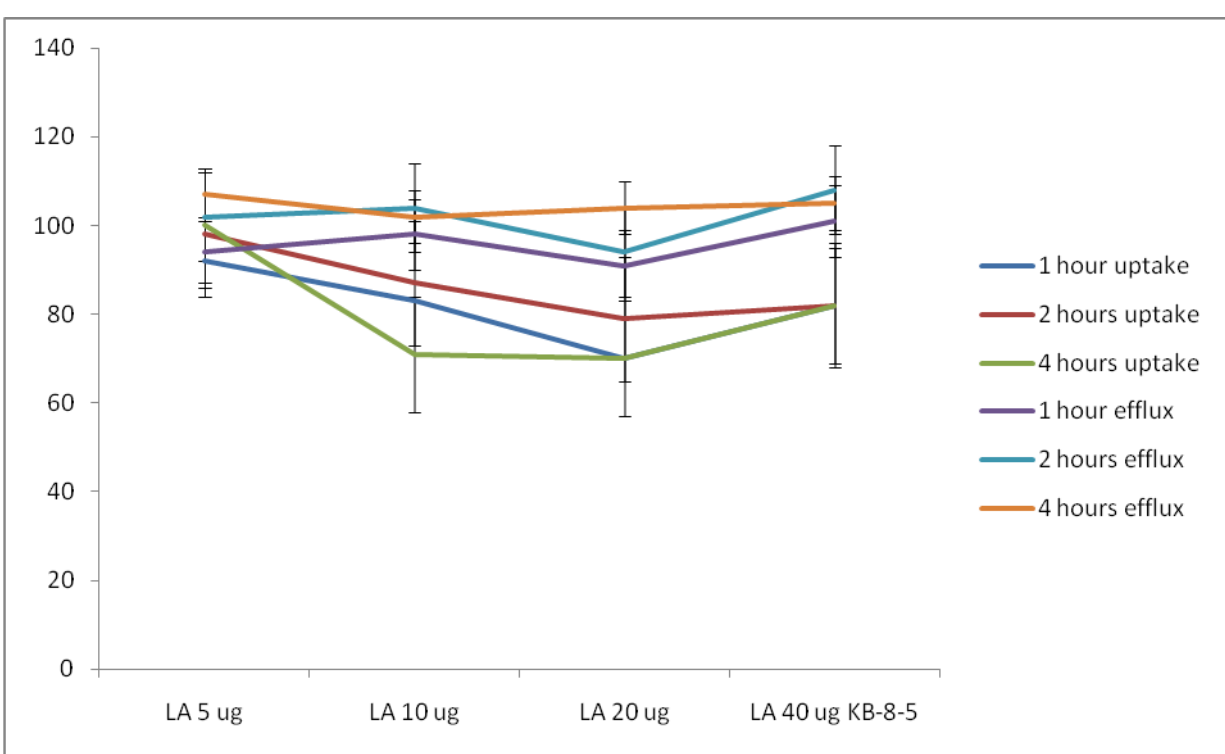

Supplement: 12944_2011_552_MOESM17_ESM.pdf [file 12944_2011_552_MOESM17_ESM.pdf]
